# Supplementary material for: DNA-PK promotes DNA end resection at DNA double strand breaks in G0 cells
Source: PubMed Central journal article supplement (PMC9122494; doi:10.7554/elife.74700), 2022-05-16

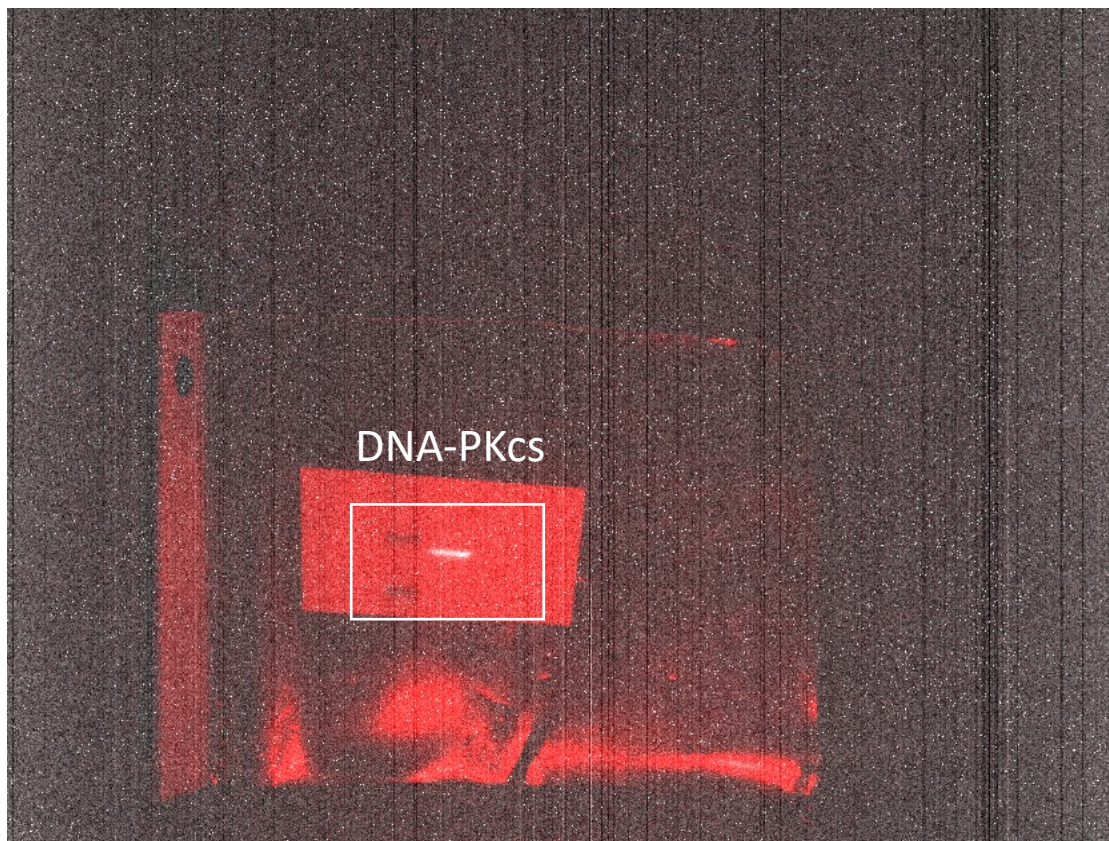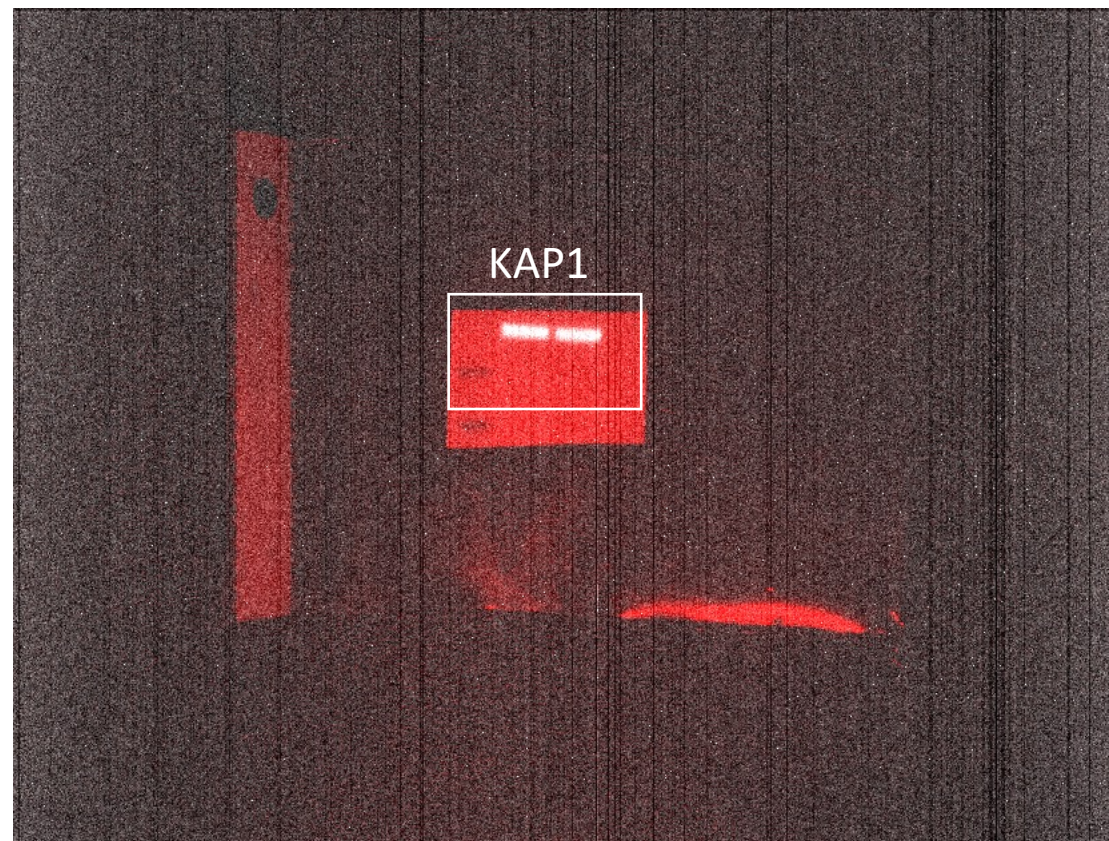

Supplement: elife-74700-fig2-figsupp1-data1.pdf [file elife-74700-fig2-figsupp1-data1.pdf]
