# Supplementary material for: DNA-PK promotes DNA end resection at DNA double strand breaks in G0 cells
Source: eLife journal article supplement (doi:10.7554/elife.74700), 2022-05-09
Supplement: fig1-figsupp1-data1 [file elife-74700-fig1-figsupp1-data1-v2.pdf]

9/2/24

Lj4-45.  
P3-1269-169.26

|       |   |   |   |
|-------|---|---|---|
| gCtIP | - | + | - |
| Mre11 | - | - | + |

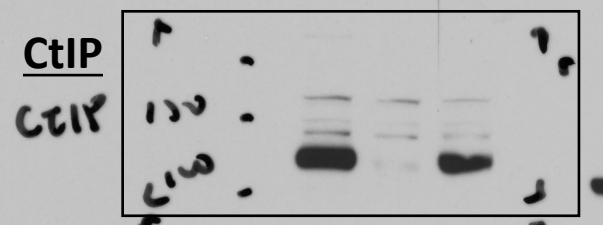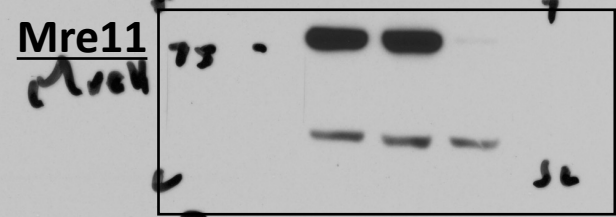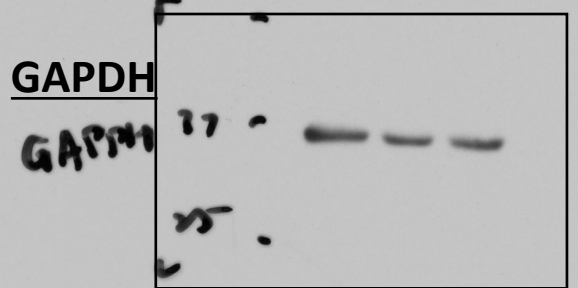

(5/4/20 samples)
